# Supplementary material
Source: Research Square preprint supplement (doi:10.21203/rs.3.rs-8989803/v1)
Supplement: Supplementary file 1 [file 4f7aba7c7a72159844506256.docx]

**Fig. S1 The CRISPR-Cas9 knockout of KDM5B produced a heterogeneous population of KDM5B KOs.** (**A**) The amplified region surrounding the edit showed a range of deletions in the heterogeneous KO population, with the strongest band approximately -150 bp. The clone isolated from the population has a single band at -150bp. (**B**) The Sanger traces of the *KDM5B*-KO clone reveal a homozygous -143 bp deletion. (**C**) DECODR analysis estimated a 100% frame shift in the *KDM5B*-KO clone population.

**Fig. S2 Fluorescent western blot images demonstrating loss of KDM5B protein expression in the KDM5B knockout clone.** KDM5B was detected in green, while HSC70 (red) served as an endogenous loading control.

**Fig. S3 Whole-genome sequencing (WGS) coverage at the KDM5B edit site on chromosome 1 confirms the expected deletion in the KDM5B knockout clone.** Tracks display the genomic ideogram, base-pair coordinate axis, and aligned sequencing reads with coverage shown for *KDM5B*-KO (top) and WT (bottom) samples. The reference DNA sequence is shown below, with nucleotides colour-coded: guanine (G, red), cytosine (C, orange), adenine (A, light blue), and thymine (T, blue). The KO sample exhibits a clear loss of read coverage across the targeted region, consistent with the expected deletion, whereas the WT sample shows continuous coverage.

**Fig. S4 Exploring for chromosomal changes between the *KDM5B*-KO clone and the WT through cn.mops.** Ideogram displaying the 37 CNV ranges detected through cn.mops in the KO comparing to the WT reference. Each chromosome is displayed, with areas highlighted above in red for regions with a CN < 2 and blue for regions CN > 2. All but one region was located at the centromere or telomere, and as such are likely technical noise. The remaining site was detected at Chr1:144560001 – 144800000.

**Fig. S5 Exploring for short mutations between the *KDM5B*-KO clone and the WT through Mutect2.** Mutect2 detected 5534 potential mutations across the whole KO genome. The vast majority being intergenic (yellow) or intron (light blue) variants.

**Fig. S6 ScRNA-seq expression of MORC3 and ASCC2 across neuronal differentiation in WT and KDM5B-KO cells**. Violin plots shown at days 0, 5, 12, and 18 of differentiation. WT cells are shown in salmon (left of the line) and KDM5B-KO cells in blue (right of the line). No statistically significant differences in expression were observed between WT and KO at any time point (ns, Wilcoxon).

**Fig. S7 Quantification of cell cycle phase distribution in WT and *KDM5B*-KO iPSCs.** Figure shows the percentage of cells in G1, G2/M, and S phases. Data are presented as mean +/- standard deviation with individual biological replicates overlaid. There was no significant difference between groups for any phase (NS).

**Fig. S8** **OCT4 protein was maintained in the KDM5B-KO.** A Western blot (left) and relative quantification (right) of the intensities of OCT4 and HSC70 in the WT and KO iPSCs (n=3). The intensity quantification is relative to the endogenous control HSC70 and to the WT. There was no significant difference between intensities between the WT and KO.

**Fig. S9** **K-nearest neighbour clusters were assigned a cell state determined through the expression of key markers.** A heat map of the top 5 differentially expressed genes for each cell state, comparing each cell state to all other cells. PSC clusters were hot for stem cell markers, L1TD1, ESRG, POU5F1, CRIPTO and EPCAM. NE cells displayed DLK1, NRP2, SHISA2 and LIN28A. NPCs displayed PAX6, CDH2 SOX3. Late NPCs have increased FABP7, VIM, WNT2B. As the cells transition to immature neurons, they start expressing NEUROD1, STMN2, NEUROG1 and DCX.

**Fig. S10** **Violin plots of pseudotime for each time point, split by WT and KDM5B-KO.** Except for the PSCs at day 0, the KO shows a significant reduction in pseudotime scores across the remaining time points, indicating that these cells are less advanced along the trajectory compared to the respective WT cells. At day 0 there was a significant increase in pseudotime in the KO compared to the WT. This correlates with the greater number of PAX6 and TUBB3 cells present in the KO, despite no observable differences in pluripotency at this stage. Significance bars represent Wilcoxon tests, *** p < 0.001.
